# Supplementary material for: The Microtubule End Binding Protein Mal3 Is Essential for the Dynamic Assembly of Microtubules during Magnaporthe oryzae Growth and Pathogenesis
Source: Int J Mol Sci. 2024 Feb 26;25(5):2672. doi: 10.3390/ijms25052672 (PMC10932144; doi:10.3390/ijms25052672)
Supplement: Supplementary file 1 [file ijms-25-02672-s001.zip]

Archive with 13 entries (13 files):
- ijms-2873789-supplementary.pdf
- Supplementary Movie S1.avi
- Supplementary Movie S10.avi
- Supplementary Movie S11.avi
- Supplementary Movie S12.avi
- Supplementary Movie S2.avi
- Supplementary Movie S3.avi
- Supplementary Movie S4.avi
- Supplementary Movie S5.avi
- Supplementary Movie S6.avi
- Supplementary Movie S7.avi
- Supplementary Movie S8.avi
- Supplementary Movie S9.avi
